# Supplementary material for: Fibroblast Growth Factor 23 Stimulates Cardiac Fibroblast Activity through Phospholipase C-Mediated Calcium Signaling
Source: MDPI journal article supplement (doi:10.3390/ijms23010166), 2021-12-23
Supplement: s1 [file s1]

## Supplemental Figures

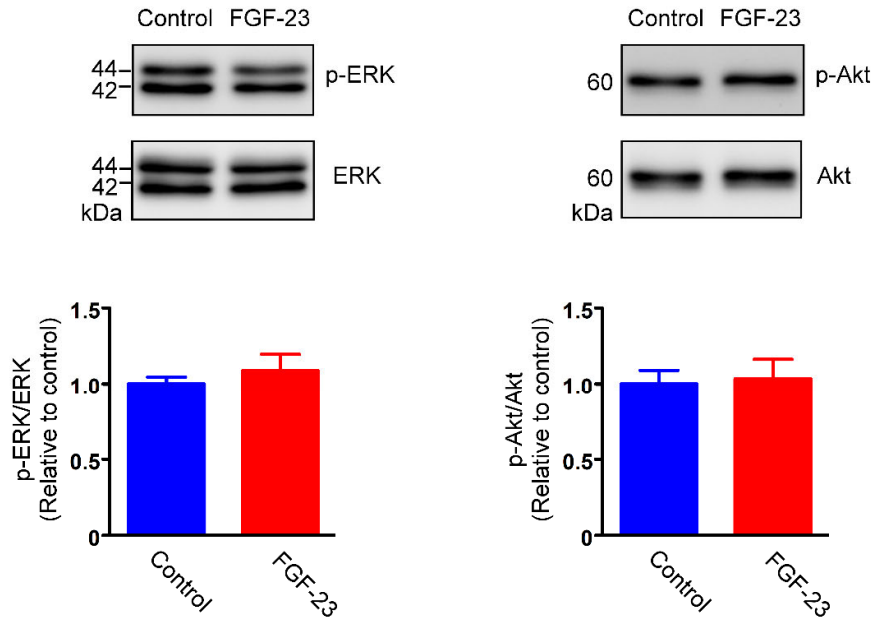

**Figure S1.** Fibroblast growth factor (FGF)-23 on extracellular signal-regulated kinase (ERK) and protein kinase B (Akt) signalings in human atrial fibroblasts. Representative immunoblots of total and phosphorylated-ERK (p-ERK) (left panel), total and phosphorylated-Akt (p-Akt) (right panel) in cardiac fibroblasts without and with FGF-23 (25 ng/mL) treatment for 15 minutes. FGF-23 (25 ng/mL) did not change phosphorylation levels of ERK and Akt in human atrial fibroblasts. Ratio of p-ERK to ERK or p-Akt to Akt was expressed as a fold change relative to control ( $n = 5$ ). Paired  $t$ -test was used to compare the control and FGF-23-treated human cardiac fibroblasts. The antibodies used for western blot were ERK (#9102, Cell Signaling), p-ERK (#4370, Cell Signaling), Akt (#4685, Cell Signaling), and p-Akt (#4060, Cell Signaling).

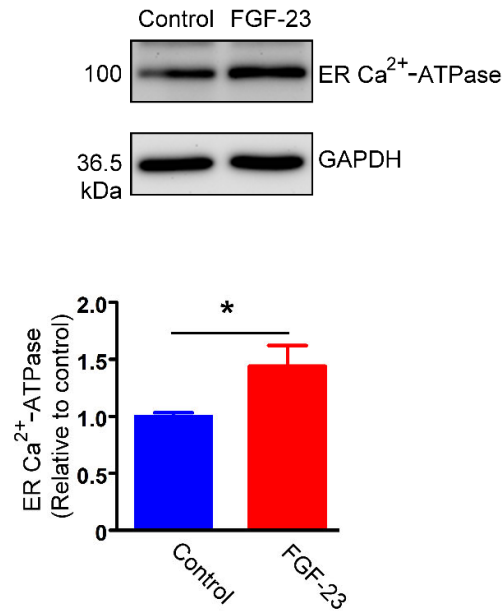

**Figure S2.** Fibroblast growth factor (FGF)-23 on protein expression levels of endoplasmic reticulum calcium ATPase (ER Ca<sup>2+</sup>-ATPase) in human atrial fibroblasts. Representative immunoblots and average data of ER Ca<sup>2+</sup>-ATPase in cardiac fibroblasts without and with FGF-23 (25 ng/mL) treatment for 48 hours. FGF-23 (25 ng/mL)-treated human atrial fibroblasts had a greater expression of ER Ca<sup>2+</sup>-ATPase than did control cells. Data was expressed as a fold change relative to control (n = 5). Paired *t*-test was used to compare the control and FGF-23-treated human cardiac fibroblasts. \* *p* < 0.05. The antibodies used for western blot were ER Ca<sup>2+</sup>-ATPase (#sc-8095, Santa Cruz) and glyceraldehyde 3-phosphate dehydrogenase (GAPDH) (#M171-7, MBL).

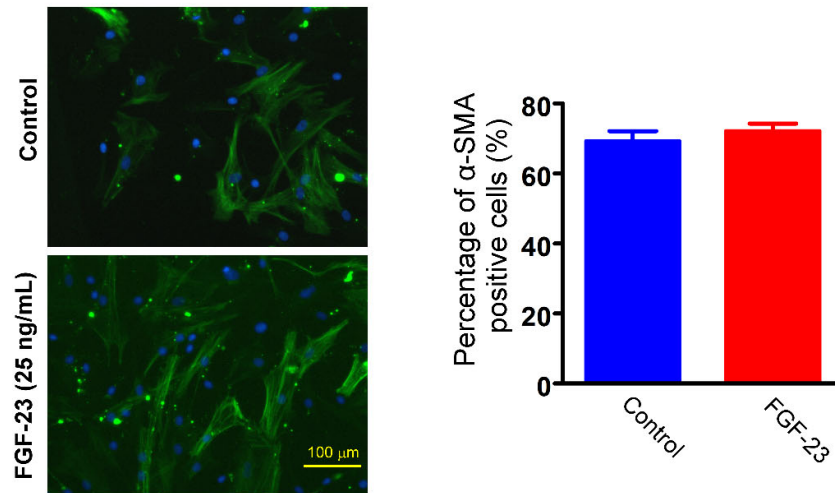

**Figure S3.** Fibroblast growth factor (FGF)-23 on the expression of  $\alpha$ -smooth muscle actin ( $\alpha$ -SMA) in cultured human atrial fibroblasts. Representative photograph of immunofluorescence microscopy imaging (left panel) and average data (right panel,  $n = 5$ ) of  $\alpha$ -SMA expression in cardiac fibroblasts without and with FGF-23 (25 ng/mL) treatment for 48 hours. The expression of  $\alpha$ -SMA was assessed by immunofluorescence staining (green) as described previously (Chen et al., 2021, Int J Mol Sci, doi:10.3390/ijms22020842). Nuclei were counterstained by DAPI (blue). The percentage of  $\alpha$ -SMA positive cells were similar between control and FGF-23 (25 ng/mL)-treated human atrial fibroblasts. Data were expressed as a ratio of the number of  $\alpha$ -SMA positive cells to the number of DAPI positive cells. Paired  $t$ -test was used to compare the control and FGF-23-treated human cardiac fibroblasts. Scale bar represents 100  $\mu$ m.
